# Supplementary material
Source: Springer Nature journal article supplement (https://www.springermedizin.de/resource/supplementary/12985_2014_2467_MOESM1_ESM.pdf/9606802)
Supplement: MOESM1 [file 9606802]

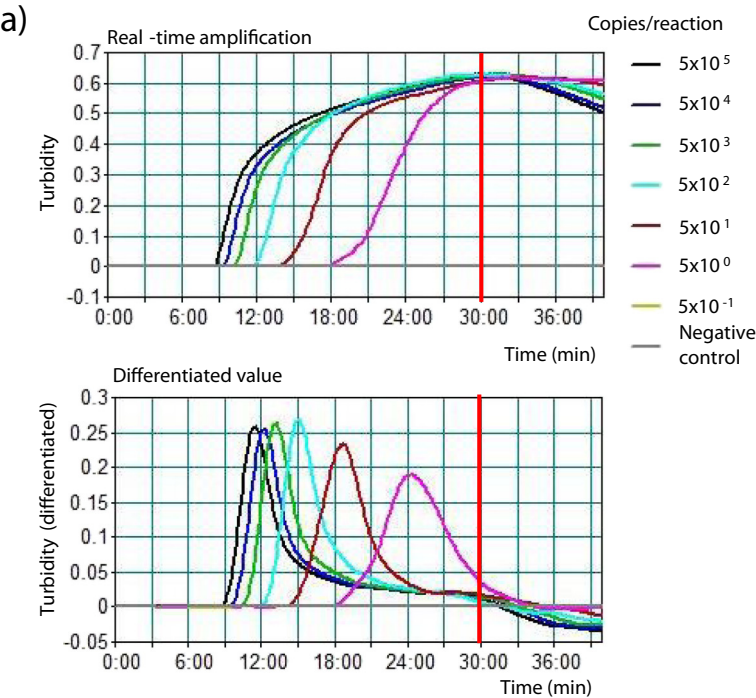

**b)**

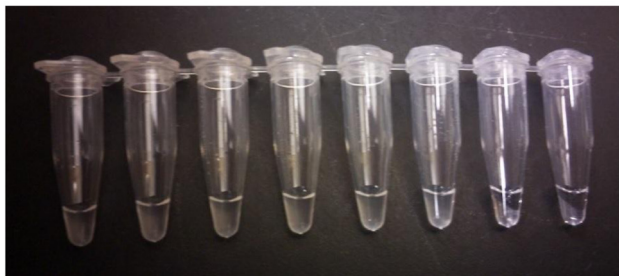

Copies /reaction

$5 \times 10^5$   $5 \times 10^4$   $5 \times 10^3$   $5 \times 10^2$   $5 \times 10^1$   $5 \times 10^0$   $5 \times 10^{-1}$  Negative control

**c)**

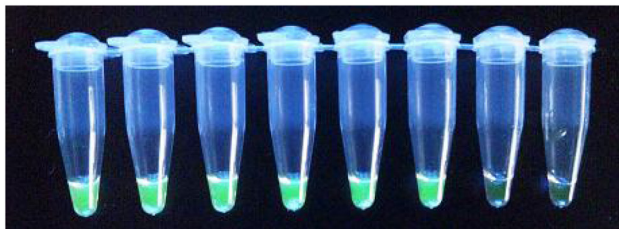

Copies /reaction

$5 \times 10^5$   $5 \times 10^4$   $5 \times 10^3$   $5 \times 10^2$   $5 \times 10^1$   $5 \times 10^0$   $5 \times 10^{-1}$  Negative control
